# Supplementary material for: A Reverse Genetics System for Zika Virus Based on a Simple Molecular Cloning Strategy
Source: Viruses. 2018 Jul 12;10(7):368. doi: 10.3390/v10070368 (PMC6071187; doi:10.3390/v10070368)
Supplement: Supplementary file 1 [file viruses-10-00368-s001.pdf]

# Supplementary Materials:

synZIKV H/PF/2013

| # | Position  | Sequences |                                                      | Score |
|---|-----------|-----------|------------------------------------------------------|-------|
| 1 | 34-83     | Original  | ttcgagtttgaagcgaaagctagcaacagtatcaacaggtTttattttgg   | 0,98  |
|   |           | Modified  | Not modified due to RNA secondary structures         |       |
| 2 | 905-954   | Original  | gcttttgggaagctcaacgagccaaaaagtcataacttgGtcatagatac   | 0,98  |
|   |           | Modified  | gcttCtgggaagctcaacgagccaaaaagtcataCtacttgGtcatagatac |       |
| 3 | 1432-1481 | Original  | tcgttaatgacacaggacatgaaactgatgagaatagagcGaaggttgag   | 0,97  |
|   |           | Modified  | tcgttaatgaTtacaggacatgaaactgatgagaacCagagcGaaggttgag |       |
| 4 | 1836-1885 | Original  | ggccacttgaaatgtcgctgaaaatggataaacttagatTgaagggcgt    | 0,96  |
|   |           | Modified  | ggccacCtgaaatgtcgctgaaaatggaCaaacttagatTgaagggcgt    |       |
| 5 | 2104-2153 | Original  | tggaaacttgatccaccatttggggactcttacttgatAggagtcggg     | 0,86  |
|   |           | Modified  | tggaaactCgatccaccatttggggactcttacttgatAggagtcggg     |       |
| 6 | 2205-2254 | Original  | gcatttgaagccactgtgagaggtgccaagagaatggcagTcttgggaga   | 0,94  |
|   |           | Modified  | gcattCgaagccactgtgagaggtgccaagagGatggcagTcttgggaga   |       |
| 7 | 2341-2390 | Original  | cattgtttggaggaatgtcctggttctcacaattctcatTggaacgttg    | 0,99  |
|   |           | Modified  | cattgttCggaggaatgtcctggttctcacaGattctcatTggaacgttg   |       |
| 8 | 2560-2609 | Original  | acgttgaagcctggaggaccggtacaagtaccatcctgaCtccccccgt    | 0,88  |
|   |           | Modified  | acgtCgaagcctggaggaccggtacaagtaccatcctgaCtccccccgt    |       |

X exchanged nucleotides for CEP silencing      X +1 nt of *in silico* predicted CEP (program output)

**Figure S1:** Results of *in silico* prediction of cryptic prokaryotic promoters in the MR766 sequence.

**synZIKV MR766**

| #  | Position  | Sequences |                                                      | Score |
|----|-----------|-----------|------------------------------------------------------|-------|
| 1  | 34-83     | Original  | ttcgagtttgaagcgagagctaacaacagtatcaacaggtTtaatttgga   | 0,98  |
|    |           | Modified  | Not modified due to RNA secondary structures         |       |
| 2  | 353-402   | Original  | aaatttaagaaagatcttgctgccatgttgagaataatcaAtgctaggaa   | 0,97  |
|    |           | Modified  | aaatttaagaaagatcttgctgccatgttgagGataatcaAtgctaggaa   |       |
| 3  | 692-741   | Original  | acttgggttggtgtacggaacctgtcatcataaaaaaggtgAagcacggcg  | 0,94  |
|    |           | Modified  | acGtgggttggtgtacggaacctgtcatcaCaaaaaaggtgAagcacggcg  |       |
| 4  | 781-830   | Original  | gaaattgcaaacgcggtcgagacttggctagaatcaagaGaatacacaa    | 0,97  |
|    |           | Modified  | gaaattAcaaacgcggtcgagacttggctGgaatcaagaGaatacacaa    |       |
| 5  | 904-953   | Original  | gcttttgggaagctcgacgagccaaaaagtcataacttgGtcattgatac   | 0,97  |
|    |           | Modified  | gcttttAggaagctcgacgagccaaaaagtcattTtacttgGtcattgatac |       |
| 6  | 1215-1263 | Original  | cctacctgacaagcaatcagacactcaatatgtttgcaaAgaacattg     | 0,96  |
|    |           | Modified  | cctacctGgacaagcaatcagacactcaatatgtCtgcaaAgaacattg    |       |
| 7  | 1657-1706 | Original  | tccacattggaacaacaaggaggcattagtgaattcaagGacgcccacg    | 0,94  |
|    |           | Modified  | tccacaCtggacaacaacaaggaggcattagtgaGttcaagGacgcccacg  |       |
| 8  | 1780-1829 | Original  | ggctgagatggatggtgcaaaggaaggctatttcttggcCacttgaaat    | 0,88  |
|    |           | Modified  | ggctgagatggatggtgcaaaggaaggctGtttcttggcCacttgaaat    |       |
| 9  | 2048-2097 | Original  | gtgattactgaaagcactgagaattcaaagatgatgttggAgctcgaccc   | 0,94  |
|    |           | Modified  | gtgatCactgaaagcactgagaattcaaagatgatgttggAgctcgaccc   |       |
| 10 | 2111-2160 | Original  | tcttacattgtcataggagttggggataagaaaatcaccAtcactggca    | 0,94  |
|    |           | Modified  | tcttacatCgtcataggagttggggataagaaGatcacccAtcactggca   |       |
| 11 | 2186-2235 | Original  | gcatttgaagccactgtgagaggcgctaagagaatggcagTcctggggga   | 0,95  |
|    |           | Modified  | gcattCgaagccactgtgagaggcgctaagagGatggcagTcctggggga   |       |
| 12 | 2541-2590 | Original  | acgttgaagcctggaggaccggtacaagtaccatcctgaCtcccctcgt    | 0,88  |
|    |           | Modified  | acgtCgaagcctggaggaccggtacaagtaccatcctgaCtcccctcgt    |       |

**X** exchanged nucleotides for CEP silencing      **X** +1 nt of *in silico* predicted CEP (program output)

**Figure S2:** Results of *in silico* prediction of cryptic prokaryotic promoters in the H/PF/2013 sequence.

**Table S1.** Modified restriction sites in MR766 syn-sequence.

| Position of restriction site | Original codon within site | Changed codon within site | Enzyme | Added/deleted | Comment                                                    |
|------------------------------|----------------------------|---------------------------|--------|---------------|------------------------------------------------------------|
| 896                          | GCC                        | GCG                       | NruI   | +             | Methylated in dcm <sup>+</sup> / dam <sup>+</sup> bacteria |
| 1748                         | GGA                        | GGC                       | NarI   | +             | None                                                       |
| 3317                         | GGT                        | GGA                       | KpnI   | -             | One site remains                                           |
| 3845                         | CTG                        | CTA                       | NheI   | -             | One site remains                                           |
| 6387                         | AGG                        | CGG                       | XmaI   | +             | None                                                       |
| 7769                         | GCT                        | GCG                       | AscI   | +             | None                                                       |
| 8264                         | GGA                        | GGC                       | SpeI   | -             | One site remains                                           |

**Table S2.** Modified restriction sites in H/PF/2013 syn-sequence.

| Position of restriction site | Original codon within site | Changed codon within site | Enzyme | Added/deleted | Comment          |
|------------------------------|----------------------------|---------------------------|--------|---------------|------------------|
| 711                          | GGA                        | GGT                       | KpnI   | +             | None             |
| 747                          | TCT                        | TCC                       | XbaI   | -             | One site remains |
| 2581                         | AGG                        | CGG                       | AgeI   | +             | None             |
| 2712                         | GAG                        | GAA                       | SacI   | -             | One site remains |
| 3858                         | AGC                        | AGT                       | SphI   | -             | One site remains |
| 4323                         | GCC                        | GCA                       | SacII  | -             | One site remains |
| 5752                         | AGC                        | AGT                       | SacI   | -             | One site remains |
| 7737                         | GAG                        | GAA                       | EcoRI  | +             | None             |
| 8520                         | AGG                        | AGA                       | BamHI  | -             | One site remains |
| 9120                         | TTT                        | TTC                       | XbaI   | -             | One site remains |
